# Supplementary material
Source: PubMed Central journal article supplement (PMC4833515)

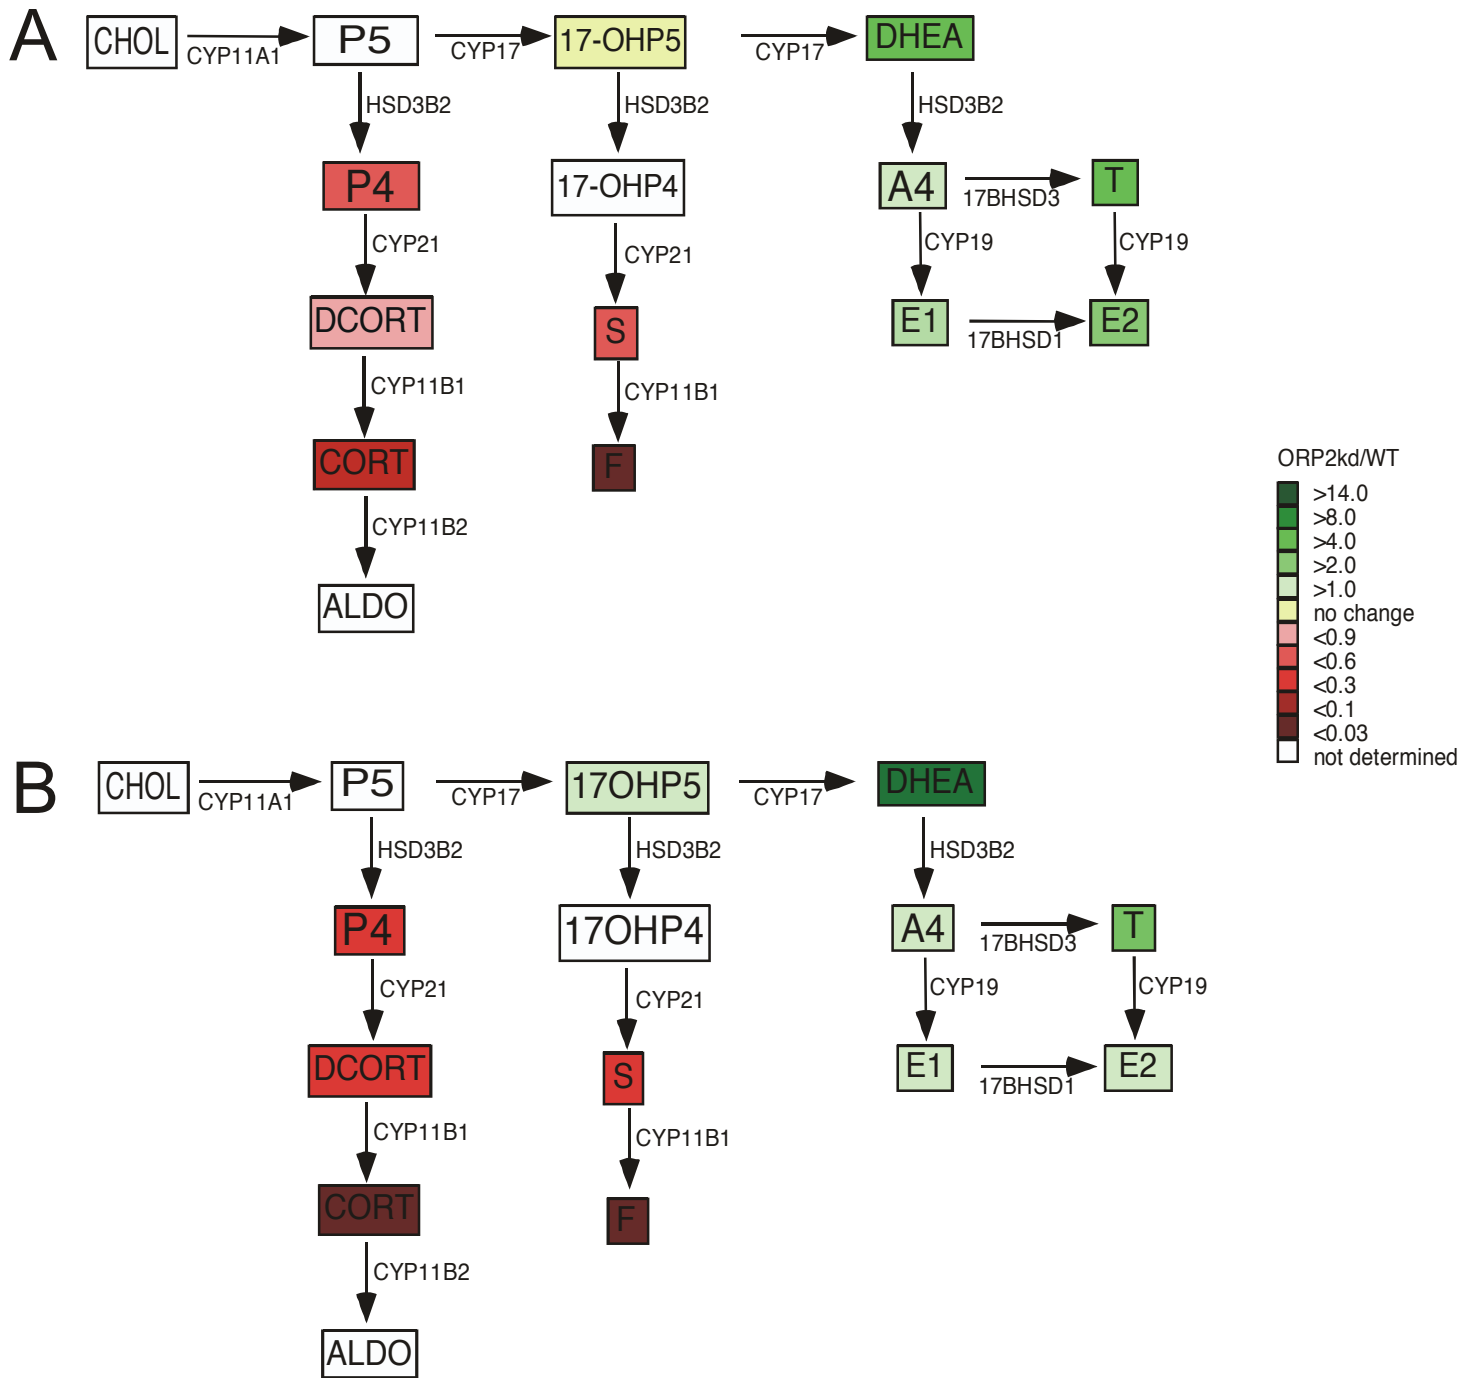

Supplement: NIHMS771734-supplement-1.pdf [file NIHMS771734-supplement-1.pdf]
